# Meta-Analysis of ERP Investigations of Pain Empathy underlines methodological issues in ERP research.

Michel-Pierre Coll<sup>a</sup>

<sup>a</sup>michel-pierre.coll@psy.ox.ac.uk, Department of Experimental Psychology, University of Oxford, Anna Watts Building, Radcliffe Observatory Quarter, Woodstock Road, Oxford OX2

This manuscript was compiled on May 20, 2018

Empathy has received considerable attention from the field of cognitive and social neuroscience. A significant portion of these studies used the event-related potential (ERP) technique to study the mechanisms of empathy for pain in others in different conditions and clinical populations. These show that specific ERP components measured during the observation of pain in others are modulated by several factors and altered in clinical populations. However, issues present in this literature such as analytical flexibility and lack of type 1 error control raise doubts regarding the validity and reliability of these conclusions. The current study compiled the results and methodological characteristics of 40 studies using ERP to study empathy of pain in others. The results of the meta-analysis suggest that the centro-parietal P3 and late positive potential component are sensitive to the observation of pain in others, while the early N1 and N2 components are not reliably associated with vicarious pain observation. The review of the methodological characteristics shows that the presence of selective reporting, analytical flexibility and lack of type 1 error control compromise the interpretation of these results. The implication of these results for the study of empathy and potential solutions to improve future investigations are discussed.

Empathy | Pain | ERP | Methods | Meta-analysis

**Abstract:** 200 words

**Main text:** approx. 6579 words

## 12 Introduction

13 Empathy is a complex psychological construct that refers to the ability of individuals to share the experience of  
 14 others (Batson, 2009; Coll et al., 2017; Cuff et al., 2016). It is of high importance for healthy interactions with  
 15 others and has been suggested to be altered in several psychiatric conditions (Bird & Viding, 2014; Decety  
 16 & Moriguchi, 2007). With the hope that understanding the neuronal mechanisms of empathy will bring new  
 17 insights on this concept, it has been one of the main endeavours of social neuroscience to describe the cerebral  
 18 processes and computations underlying empathy (de Vignemont & Singer, 2006; Decety & Jackson, 2004;  
 19 Klimecki & Singer, 2013).

20 While it is challenging to elicit empathy in a controlled neuroimaging experiment, studies often use cues  
 21 of nociceptive stimulation in others (i.e. a needle piercing a hand) to study empathy since they are relatively  
 22 unambiguous, highly salient and easily understood (Vachon-Preseu et al., 2012). In the electroencephalography  
 23 (EEG) literature, the event-related potential (ERP) technique has mostly been used to study this phenomenon  
 24 by measuring electrical brain responses to nociceptive cues depicting various levels of pain in others. In a  
 25 seminal study, Fan and Han, 2008 showed participants real pictures or cartoon depictions of hands in painful or  
 26 neutral situations and asked participants to either judge the intensity of the pain experienced or to count the  
 27 number of hands present in the stimuli. The results showed an early effect of pain in the N1 and N2 component  
 28 that was not influenced by task demands and a later effect of pain in the P3 component that was modulated  
 29 by task requirements. The authors interpreted these results as the presence of an early automatic response  
 30 indexing emotional sharing and a late response indexing the cognitive evaluation of others' pain (Fan and Han,  
 31 2008). Similar paradigms are now regularly used to study pain empathy in healthy and clinical samples (see  
 32 Results section). Although innovative, the study by Fan and Han, 2008 has several limitations. By analysing  
 33 multiple time-windows at several scalp locations, the authors to perform over 100 statistical tests on ERP data  
 34 without adjusting the significance threshold for those multiple comparisons. This suggests that some results  
 35 have a high probability of being false positives (Kilner, 2013) and that the effect of vicarious pain observation  
 36 on ERP therefore deserves further scrutiny.

37 The issue of multiple comparisons is a common problem in neuroimaging studies due to the large amount of  
 38 data collected (Luck & Gaspelin, 2017; Poldrack et al., 2008). In the ERP literature, this is often made worse  
 39 by the traditional use of factorial analyses performed in several time windows and at several scalp locations  
 40 without clear hypotheses on the main effects and interactions (Luck & Gaspelin, 2017). Furthermore, this  
 41 large amount of data also allows for considerable analytical flexibility; that is the idea that the same dataset  
 42 can be analysed in different ways with significant changes in the results and interpretations depending on the  
 43 analytical pipeline chosen (Carp, 2012). The presence of flexibility in design and analysis choices and ambiguity  
 44 regarding how to best to make these choices can lead researchers to compare the results of different analytical  
 45 pipelines and choose the one which gives the most favourable pattern of result (Carp, 2012; Simmons et al.,

2011). When considerable analytical variability is present in a particular field without justification, it can raise doubt regarding the validity of the results and their interpretations.

If the study of pain empathy using ERP is to provide results that are appropriate to further our understanding of empathy in different contexts and populations, it seems imperative to assess 1) the reliability of the effect of the observation of pain in others on the ERP response and 2) the amount of variability and flexibility in the designs employed to investigate this phenomenon. To reach these aims, a review of the methodological practices used in 40 ERP studies investigating pain empathy and a meta-analytical compilation of their results was performed. The results provide meta-analytical evidence for the association between late ERP components and the observation of pain in others. However, there was considerable variation in the design and analyses and incomplete reporting of results, raising doubts on the validity of some of these results.

## Methods

### Study selection.

A systematic review of the literature was performed following the Preferred Reporting Items for Systematic Reviews and Meta-Analyses (PRISMA) guidelines (Moher et al., 2009). The articles included in this review were selected by searching *PubMed* for studies that were available online before May 1, 2018 using different combinations of keywords (e.g. “EEG”, “ERP”, “Pain”, “Empathy”, “Vicarious”, see Table S1). The reference lists and citations reports of eligible studies were also consulted.

To be included in this report, studies had to report scalp ERP data in response to pictures depicting nociceptive stimulations (e.g. Jackson et al. (2005)). Studies using facial expressions stimuli were included only when nociceptive stimulations were visible in the stimuli (e.g. needle piercing the skin of the face). This procedure led to the selection of 40 studies published between 2008 and 2018 in 20 different journals (see Table S1 and asterisks in the references list).

From the 40 studies reviewed, 4 were excluded from the quantitative meta-analysis. One was excluded because it used the same dataset and analyses as another study (Han et al., 2008), one because it did not report sufficient information (Ikezawa et al., 2012), one because it used non-parametric statistics (Fitzgibbon et al., 2012) and one because it reported incorrect degrees of freedom and *F* statistics (Sun et al., 2017). The quantitative meta-analysis was therefore performed on 36 studies (marked with double asterisks in the References). The PRISMA flowchart for study selection and rejection is shown in Figure 1. The data reported in this review were manually extracted from the text of the published articles or accompanying supplementary materials and available in Table S1.

### Methodological review.

Several variables concerning the Participants, Materials and procedures, Data collection and preprocessing, ERP measurements, Statistical analyses and the Reporting of results were collected and summarized below.

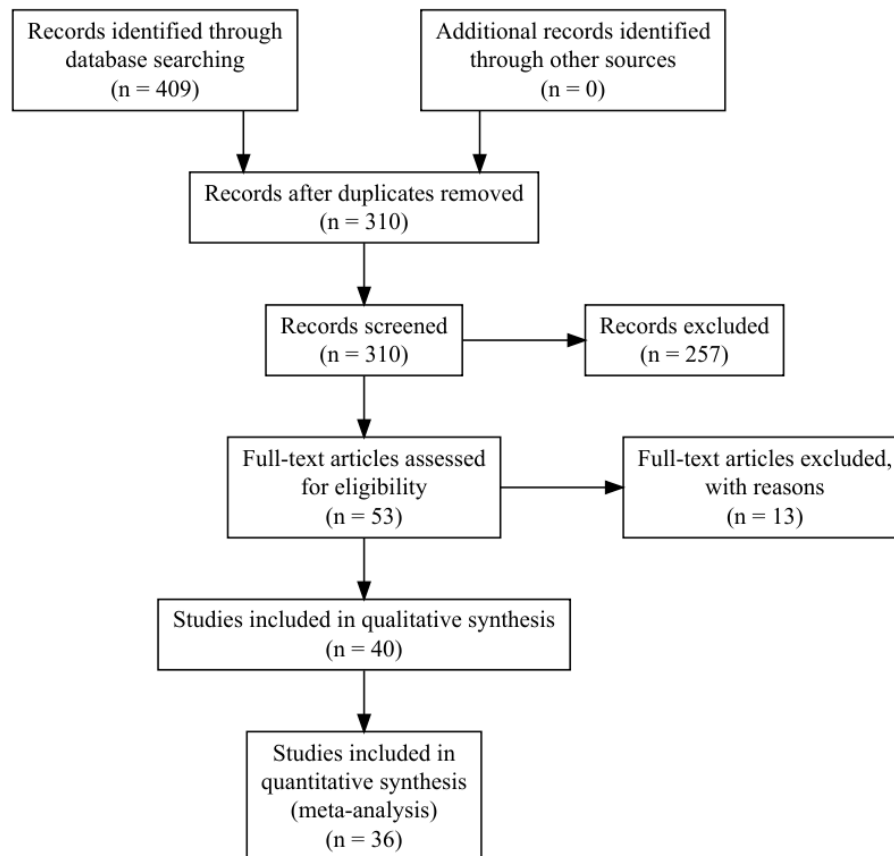

Fig. 1. PRISMA flowchart. Reasons for exclusions for studies not included are shown in Table S1.

When information was not clearly reported, the value was estimated based on the available information or assumed to have a particular value (e.g. when no post-hoc correction was reported, it was assumed that none were used). When insufficient information was available for a particular variable, it was marked as not reported and treated as a missing value.

In order to assess the exhaustiveness of the hypotheses formulated regarding ERPs in each study, hypotheses were classified in one of four categories: *Complete*, *Partial*, *Alternative* and *None*. Hypotheses were rated as *Complete* if they clearly predicted the specific components that were expected to be influenced by all manipulations as well the direction and the location of this effect. If some predictions were present but were incomplete or unclear, the hypothesis was rated as *Partial*. Hypotheses that were formulated as two alternative outcomes without a clear prediction were labeled *Alternative* and the absence of prediction regarding ERP effects was labeled *None*. This procedure was applied separately for the factorial analysis of variance performed on ERP components and for the correlational analysis of ERP components with other variables.

# 91 **Meta-analysis of ERP components.**

92 A quantitative meta-analysis was carried out to assess the evidence for a modulation of different ERP components  
93 by the observation of pain. However, this was complicated by the fact that most studies reviewed reported  
94 only significant results (see Section 3.5 Results reporting) and the general lack of clarity and precision of the  
95 results section of many studies. Nevertheless, when possible, *F*-values for the omnibus repeated measures test  
96 comparing the ERP response to pain and neutral stimuli were collected for each study.

97 When several between and within-subject factors were manipulated, the *F*-value of the baseline condition  
98 was selected when available. (e.g. in healthy controls or following neutral priming). Similarly, when available,  
99 the *F* values for individual electrodes were collected. However, in most cases, the omnibus *F* value from the  
100 main effect of pain in a multi-factorial analysis was collected and attributed to all electrodes included in the  
101 analysis. When mean amplitudes and standard deviations or standard errors were reported, the paired sample  
102 *t*-value for the pain effect was calculated assuming a correlation of 0.70 between measurements. When only the  
103 exact *p*-value was reported, the corresponding *t*-value was found using the *t* distribution. Following available  
104 guidelines (Cooper & Hedges, 1994; Moran et al., 2017), when the effect was reported as non-significant without  
105 the information necessary to compute an effect size, the effect size was calculated assuming  $p = 0.5$ .

106 This was done for each of the most frequently analysed components (N1, N2, P3, LPP). All *F* values  
107 were subsequently converted to *t*-values by taking their square root (Brozek & Alexander, 1950). In order to  
108 compare the effect sizes across studies, the *t*-values collected for each electrode and component were converted  
109 to Hedges's *g*, a standardized measure of difference that is less biased than Cohen's *d*, especially for small  
110 samples (Hedges, 1981). Effects were scored as positive when the observation of pain led to increased ERP  
111 amplitude (i.e. more positive) than the observation of neutral stimuli, and as negative when the ERP amplitude  
112 was more positive in response to neutral stimuli compared to pain stimuli.

113 Effect sizes were summarised in different ways. First, the spatial distribution of the effects was assessed by  
114 plotting scalp maps of the weighted absolute effect size for each component of interest. The absolute effect  
115 was taken to show where the effects were stronger on the scalp independently of their direction. The average  
116 effect at each electrode was weighted by the number of studies including this electrode in their analysis in  
117 order to decrease the weight of the effects at electrodes that were only analysed in a small number of studies.  
118 Second, the proportion of significant effects and significant interactions with other factors was compiled for  
119 each component. Third, a random effect meta-analysis was performed for each component at fronto-central (Fz,  
120 FCz, F1, F2, F3, F4, FC1, FC2, FC3, FC4), centro-parietal (Cz, CPz, C1, C2, C3, C4, CP1, CP2, CP3, CP4)  
121 and parieto-occipital (Pz, POz, P1, P2, P3, P4, PO1, PO2, PO3, PO4) electrode clusters to estimate summary  
122 effect size and the heterogeneity across studies. Finally, potential publication bias was assessed using funnel  
123 plots and regression tests (Egger et al., 1997). To assess potential excess significance, the number of studies  
124 finding a significant effect for each component was compared to the expected number of significant studies  
125 given the power of each study to detect the summary effect size using exact one-tailed binomial tests and a

126 significance threshold of 0.10 (Ioannidis & Trikalinos, 2007).

## 127 Data Availability.

128 All data and scripts used to produce this manuscript and accompanying figures, the PRISMA guidelines  
129 checklist and supplementary information and figures are available [online](#). All data processing and analyses were  
130 performed using *Rstudio* (RStudio Team, 2015; R Core Team, 2018) and the Fieldtrip toolbox (Oostenveld  
131 et al., 2011) within Matlab R2017a (The MathWorks, Inc., Natick, Massachusetts, United States).

## 132 Systematic review of methodological practices

### 133 Goals and hypotheses.

134 All studies reviewed aimed at comparing the effect of an experimental manipulation and/or participant  
135 characteristics on the ERP to pain stimuli with the goal of furthering the understanding of the mechanisms  
136 underlying empathy in the general population and/or in various clinical groups. As shown in [Table 1](#), the  
137 majority of studies presented incomplete hypotheses regarding the analysis of ERP components. While some  
138 studies provided complete hypothesis for the factorial analysis of ERPs, this was rarely the case for correlational  
139 analyses of ERP and other behavioural or physiological variables, suggesting that most of these analyses were  
140 exploratory in nature.

**Table 1. Ratings of the the exhaustiveness of hypotheses for the factorial and correlational analyses of ERP data.**

| Judgment of hypothesis | Factorial analyses on<br>ERP data (% of 40 studies) | Correlations with<br>ERP data (% of 26 studies) |
|------------------------|-----------------------------------------------------|-------------------------------------------------|
| None                   | 10                                                  | 69.23                                           |
| Partial                | 50                                                  | 26.92                                           |
| Complete               | 22.5                                                | 0                                               |
| Alternative            | 17.5                                                | 3.85                                            |

### 141 Participants.

142 In the 40 studies reviewed, 42.5% used a between-subject design and 57.5% used a within-subject design.  
143 Among studies employing a between-subjects design, 22.5% compared participants from the general population  
144 to participants from a clinical group. These clinical conditions included autism, amputation, bipolar disorder,  
145 fibromyalgia, juvenile delinquents and schizophrenia. Only 2 studies provided a justification for their sample  
146 size based on *a priori* power analyses. The average sample size, sample size per group and participants excluded  
147 are shown in [Figure 2](#). In order to assess the power of each study to detect a small ( $d = 0.2$ ), medium ( $d = 0.5$ )  
148 or large ( $d = 0.8$ ) effect size (Cohen, 1992), a power analysis was performed for each study and each of these  
149 effect size using the sample size per group, a two-sided paired t-test and a significance threshold of 0.05. As  
150 shown in [Figure 2](#), most studies were only adequately powered to detect a large effect size equal to or higher  
151 than  $d = 0.8$ . No studies had 80% power to detect a small or medium effect size.

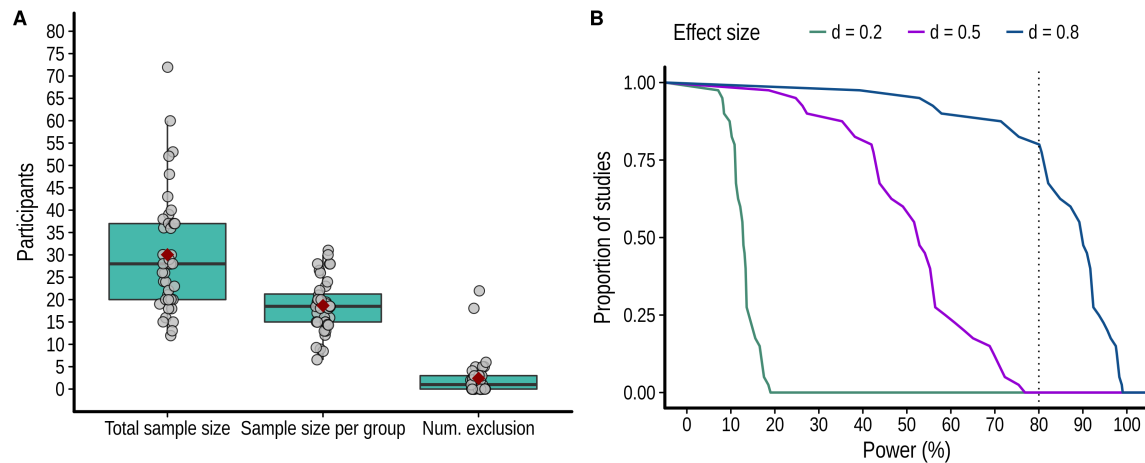

**Fig. 2. A** Total sample size, sample size per group and number of exclusion. For all box plots in this paper, the boxes show the 25th and 75th percentile, the error bars show 1.5 interquartile interval, the horizontal line shows the median, the red square shows the mean and the gray points show the individual studies. **B** Proportion of studies as a function of the level of power to detect a small ( $d = 0.2$ ), medium ( $d = 0.5$ ) and large ( $d = 0.8$ ) effect size.

## Materials and procedure.

**Visual stimuli.** The majority of studies reviewed (82.5%) used static pictures depicting limbs (hands or feet) in painful and non-painful situations similar to those used initially by Jackson et al. (2005). The other types of stimuli included short 3-frames clips of limbs in painful situations (7.5%), static pictures of faces pricked by a needle or touched with a cotton bud (5%), both faces and limbs (2.5%) and anthropomorphised objects pricked by a needle or touched with a cotton bud (2.5%). The average stimulus duration is shown in Figure 3.

**Experimental task.** All studies compared ERPs to painful and non-painful stimuli. Including this Pain factor, studies had on average 2.08 within-subjects factors ( $SD = 0.45$ , range: 1-3) and an average of 4.55 within-subjects conditions ( $SD = 1.67$ , range: 2-8). During the experimental tasks, the participants were either asked to detect the presence of pain in a forced choice format (60% of studies), to assess the intensity of the pain observed using a rating scale (17.5%), to passively observe the pictures (15%) or to perform another behavioural task (7.5%). The average number of trials per condition is shown in Figure 3.

**Recordings.** EEG was collected from 60-64 scalp electrodes in the majority of cases (70 %) while the remaining studies used 32 (27.58%), 72 (5%) or 128 (5%) scalp electrodes. 30 % of studies did not report the manufacturer of the EEG system used. The majority of studies (27.5 %) used an EEG system manufactured by Brain Products. Other manufacturers included Biosemi (27.5 %), EGI Geodesic (5%) and NuAmps (10%).

**Preprocessing.** EEG data were high-pass filtered in most cases with a cutoff value of 0.1 Hz (52.5%) and the rest of the studies used a high-pass cutoff between 0.01 and 1 Hz. For low-pass filters, the most used cutoffs were 100 Hz and 30 Hz used in respectively 30% and 40% of cases. Other low pass filters cutoffs included values between 40 and 80 Hz. 7.5% and 5% of studies did not report using a high-pass filter or a low-pass filter respectively. 5% of studies reported using a notch filter to filter out electrical noise.

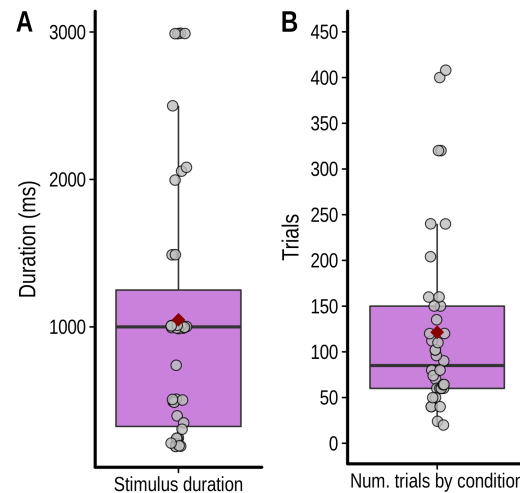

**Fig. 3. (A) Stimulus duration and (B) number of trials per condition.**

The average of the mastoid processes and the average of all scalp electrodes were the most popular reference schemes for EEG analyses (37.5% and 40% respectively). Other studies use the average of the earlobes (7.5%), a single mastoid (12.5%) or did not report the reference used for analysis (2.5%). EEG data were epoched for analyses and in all cases the average pre-stimulus baseline was subtracted from the post-stimulus epoch. The duration of this baseline was on average 193.75 ms (SD = 28.16, range = 100 - 250). The average post-stimulus epoch duration is shown in Figure 4C.

All studies reported using at least one method to remove or correct for artifacts. Artifact rejection procedures included rejecting epochs by visual inspection or using a fixed amplitude threshold. Artifact correction procedures included removing components after independent component analysis (ICA) or using various algorithms to remove EOG activity from the data. Some studies reported using additional filters to remove artifacts without providing further details. The percentage of studies using each of the main procedures is shown in Figure 4A. Automatic rejection using a fixed threshold was the most used method and the average rejection threshold is shown in Figure 4B. When using an artifact rejection procedure, 50% of studies reported the average number of epochs removed. On average, 11.34% of trials were removed (SD = 6.04, range = 1.34 - 29%).

## ERP analyses.

**ERP selection and measurement.** The average number of components analysed is shown in Figure 5C. In most cases, the choice of ERP components to analyse was based on previous studies (72.5%) while other studies chose components based on the inspection of the grand average waveform (17.5%), used another analysis to select the components of interest (2.5%) or did not justify their selection of components (7.5%). As shown in Figure 5A, the most widely analysed ERP components were the N1, N2, P2, P3 and the LPP. Note that in some cases, slightly different names were used for these components (e.g. P320 instead of P3). Furthermore,



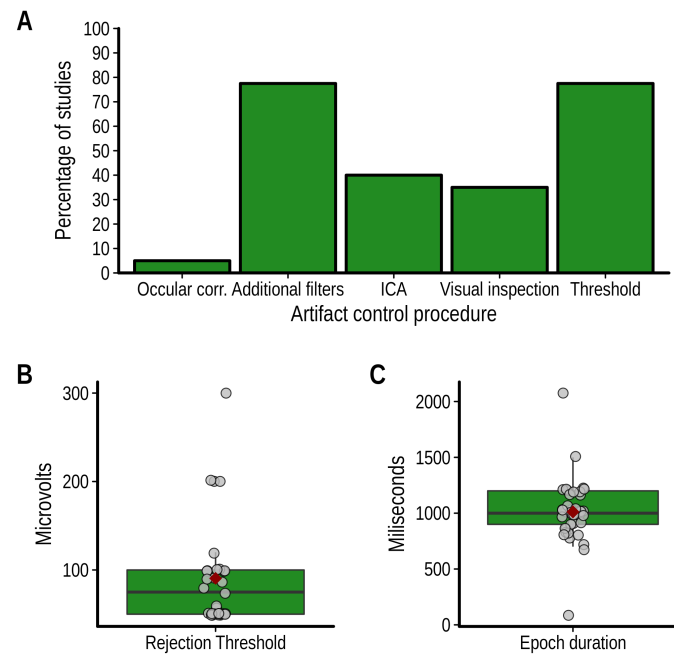

**Fig. 4. (A)** Percentage of studies reviewed using each type of artifact control procedure identified, **(B)** value of the rejection threshold if used and **(C)** duration of epochs.

some studies also performed several analyses on the same component (e.g. early and late LPP). See [Table S1](#) for the names and all components analysed in each study.

The average number of locations analysed is shown in [Figure 5C](#) and the percentage of studies analysing each scalp location is shown on a 64 electrode montage in [Figure 5B](#). A minority of studies provided a justification for the choice of locations to analyse (40%) and in most cases this choice was based on previous studies (25%). Almost all studies quantified the ERP components using the mean amplitude within a time window (80%) while other studies used the peak amplitude within a time window (7.5%) or point by point analyses (i.e., performing analyses in small time windows covering the whole ERP epoch; 7.5%). One study used peak amplitude or mean amplitude depending on the component (5%). The choice of the time window to analyse was either based on visual inspection (47.5%), previous studies (22.5%), both inspection and previous studies (previous studies (5%) the data itself (i.e circular analyses, 15%) or not justified (10%). The percentage of studies analysing each time point in the post-stimulus window for each component is shown in [Figure 5D](#).

**ERP statistical analyses.** Almost all studies used factorial analyses of variance (ANOVA) to assess the statistical significance of the experimental factors on the ERPs (95%). One study used the analysis of covariance (ANCOVA) and another used the non-parametric Kruskal-Wallis test. Since the few studies using point-by-point analyses (7.5%) performed a large number of ANOVAs compared to the rest of the studies (on average 130 ANOVAs), these studies were not considered in the following description of the factorial analyses. Another study performing 54 ANOVAs was also considered an outlier and was not included in the descriptive statistics. The

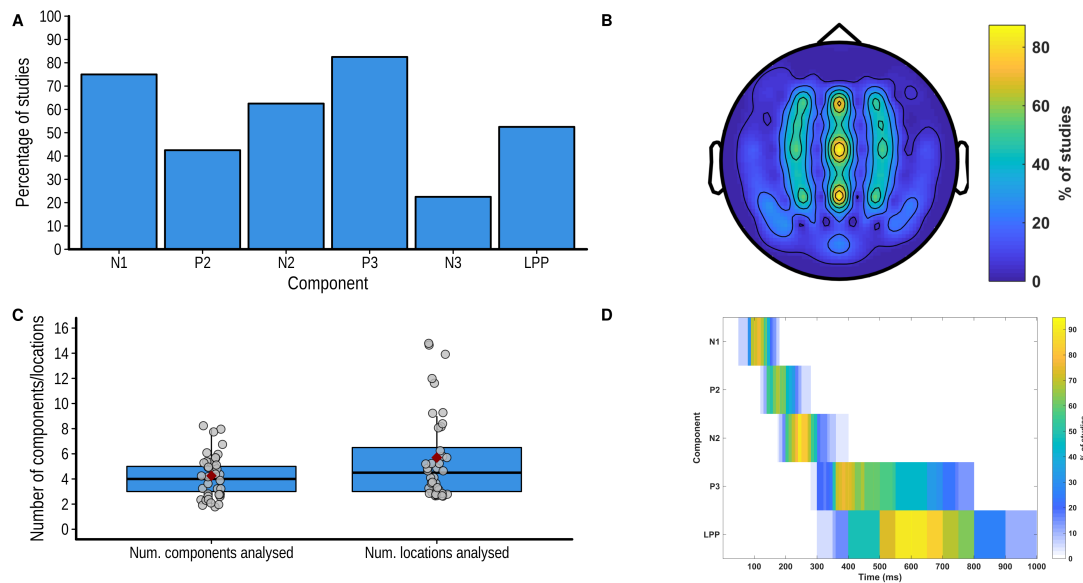

**Fig. 5. (A)** Number of components and locations analyzed in each study. **(B)** Percentage of studies analyzing each of the main component. **(C)** Percentage of studies analyzing each scalp location. **(D)** Percentage of studies analyzing each component analyzing each time-point in the post-stimulus window.

average number of ANOVAs performed in the remaining studies ( $N = 35$ ) is shown in Figure 6. These ANOVAs had on average 3.2 factors ( $SD = 0.72$ , range = 2-5) and 19.6 cells ( $SD = 15.97$ , range = 4-60). To assess how many statistical tests these ANOVAs represent, the number of main effects and potential interactions was multiplied by the number of ANOVAs (see Luck & Gaspelin (2017)). The total number of tests in ANOVAs is shown in Figure 6. No studies corrected the significance threshold for the total number of ANOVAs performed. However, some studies (60%) corrected the significance threshold when performing post-hoc comparisons using the Bonferroni (42.5%), Tukey (10%), Scheffe correction (5%) or FDR (2.5%) correction. Several studies used the Greenhouse-Geisser correction when performing repeated-measure analyses (52.5%).

65% of studies performed correlations between ERP data and other variables in addition to the factorial analyses. These correlations either used the difference between the ERP amplitude in two conditions (32.5%), the mean amplitude in a particular condition (27.5%), both mean amplitude and peak amplitude (2.5%) or mean amplitude and peak latency (2.5%) and were often performed in multiple time windows and scalp locations. The average number of correlations per study is shown in Figure 6. 10 % of studies corrected the significance threshold to control for the possibility of a type 1 error in correlation analyses.

## Results reporting.

92.5% of studies reported mainly or exclusively significant results. When reporting the results from factorial analyses, 50% of studies did not report any estimate of effect size while the rest reported the partial eta-squared (45%), Cohen's  $d$  (2.5%) or both (2.5%).

All but one study plotted the ERP data. 32.5% plotted only the time-course of the ERP response while 65%

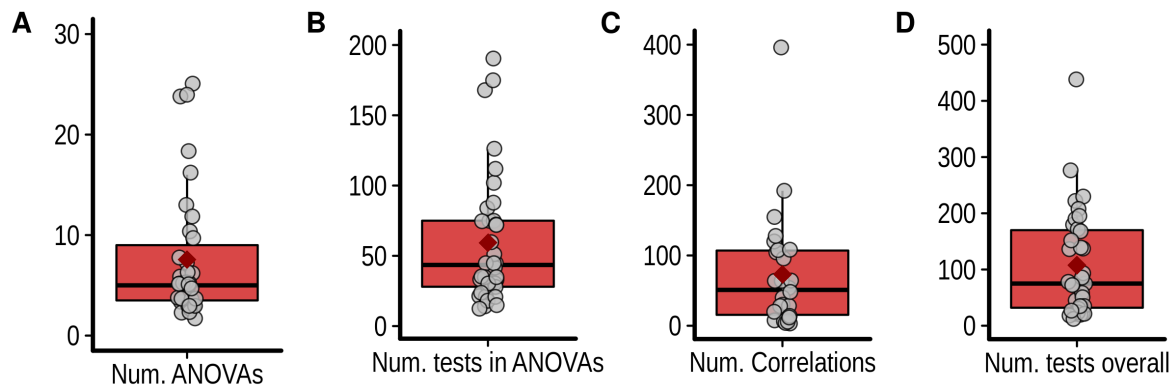

**Fig. 6.** (A) Number of ANOVAs performed, (B) total number of statistical tests performed using ANOVAs, (C) number of correlations and (D) overall number of statistical tests performed.

plotted both the time course and scalp maps at particular time points. In most cases, the locations and time points plotted were chosen because they were thought to be representative of the results (57.5%) while other studies plotted all locations analyzed (25%) or only the locations showing significant effects (15%). On the time course plots, only one study plotted the error intervals. In addition to the time course and scalp maps, 22.5% of studies also reported the ERP amplitudes in a table and 42.5% in bar graphs.

## Meta-analysis of the effect of pain observation

The results from the meta-analysis of the effect of the observation of pain stimulation on the components and locations that were the most frequently analysed are shown in Figure 7 and 8. Forest plots for each component at each location are shown in Figures S1-S8.

**N1 component.** The effect of pain observation on the N1 component is maximal at frontal electrodes (Figure 7A). Although a minority of studies measuring this component found a significant effect of pain observation, several studies found a significant interaction between the effect of pain observation and another experimental factor at any electrode site. The random-effect meta-analytic model fitted on the effect of pain on the N1 component at fronto-central sites collected from 22 studies suggests the presence of a high heterogeneity in the effect sizes ( $Q = 94.67$ ,  $df = 21$ ,  $p < 0.001$ ;  $I^2 = 79.37\%$ ). Overall, the random-effect model indicated that of pain observation on the N1 component at fronto-central sites is not significant ( $g = 0.07$ ,  $k = 22$ ,  $p = 0.644$ , 95% CI: -0.21:0.35).

**N2 component.** Similarly to the N1 component, the effect of pain observation on the N2 component is also maximal at frontal electrodes (Figure 7A). Approximately 50% of studies included in the meta-analysis found a significant effect and 27.78% found a significant interaction between the effect of pain and another experimental factor at any electrode site. At the fronto-central sites, there is evidence for significant heterogeneity across the 20 studies ( $Q = 108.46$ ,  $df = 19$ ,  $p < 0.001$ ;  $I^2 = 85.13\%$ ). Interestingly, the direction of the significant effects is highly heterogeneous, with a similar number of studies finding a significant increase or decrease in amplitude

during pain observation. This led to a non-significant overall effect of pain observation on the N2 component at fronto-central sites. ( $g = 0.18$ ,  $k = 20$ ,  $p = 0.283$ ;  $I^2 = 85.13$ , 95% CI: -0.15:0.5).

**P3 component.** While the effects of pain observation on the P3 component is distributed across the scalp, the effect is maximal at centro-parietal sites. Most studies measuring this component found a significant effect and a significant interaction between the effect of pain and another experimental factor. Although the effect sizes for the centro-parietal P3 component across the 20 studies are considerably less heterogeneous than those found for the early components, there is still significant heterogeneity across studies ( $Q = 55.78$ ,  $df = 19$ ,  $p < 0.001$ ;  $I^2 = 66.33$ ). All studies found that pain observation led to a positive shift in P3 amplitude and the overall effect is large and significant ( $g = 0.97$ ,  $k = 20$ ,  $p < 0.001$ , 95% CI: 0.73:1.2).

**LPP component.** The effect of pain observation on the LPP component is strongest at centro-parietal sites. As for the P3 component, most studies measuring this component found a significant effect of pain observation and 33.33% found a significant interaction between the effect of pain and another experimental factor. At the centro-parietal location, there is significant heterogeneity across the 17 studies ( $Q = 63.62$ ,  $df = 16$ ,  $p < 0.001$ ;  $I^2 = 76.39\%$ ), despite the fact that pain observation led to a positive shift in LPP amplitude for all studies. The overall effect of pain observation on the LPP is large and significant ( $g = 1.1$ ,  $k = 17$ ,  $p < 0.001$ , 95% CI: 0.8195:1.39).

**Publication bias and excess significance.** Funnel plots illustrating the effect size for each study as a function of study precision are shown in Figure 9. It should be noted that the low variance in precision (due to most studies having a similar sample size) limits the interpretation of these figures. Nevertheless, the funnel plots show that the effect sizes were roughly symmetrically distributed across the summary effect size, suggesting the absence of publication bias. This observation was formally tested using linear regressions to assess the relationship between the magnitude of the effect size and the precision (standard error) of each study. This procedure revealed non-significant relationships between effect size and precision for the N1 component at fronto-central sites ( $t(20) = 1.84$ ,  $p = 0.08$ ), the N2 component at fronto-central sites ( $t(18) = -0.76$ ,  $p = 0.45$ ) and the P3 component at centro-parietal sites ( $t(18) = 1.46$ ,  $p = 0.16$ ). A significant negative relationship between effect sizes and precision is present for the LPP component at centro-parietal sites ( $b = 3.91$ ,  $t(15) = 2.32$ ,  $p = 0.03$ ). This suggests that the large effect sizes found for the LPP component in some studies with a smaller sample size are likely inflated.

Exact binomial tests assessing the presence of excess significance suggest that the number of significant effects found for the N1 and N2 component is significantly higher than expected given the power of each study and the summary effect size ( $p < 0.001$  for both). The proportion of significant effects is however similar to the expected number for the P3 and LPP components ( $p > 0.9$  for both).

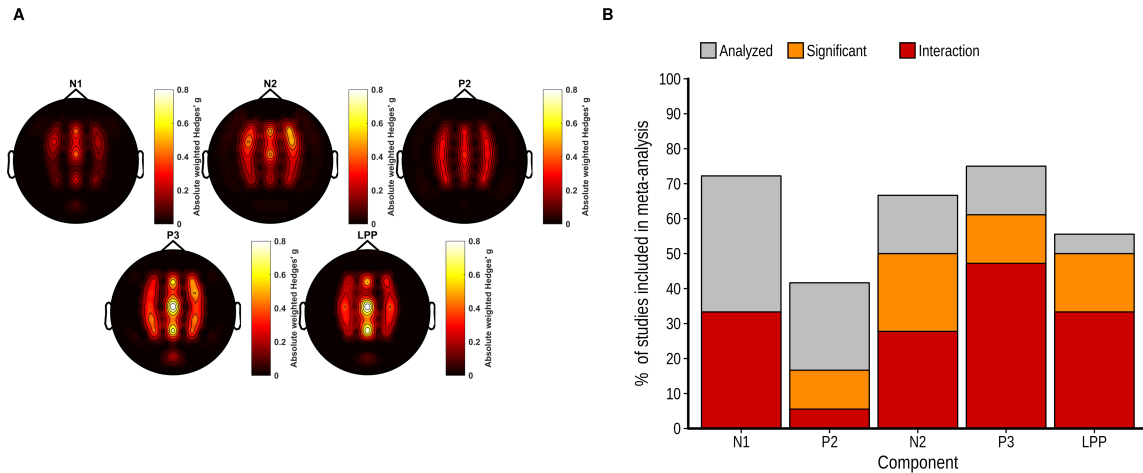

**Fig. 7. (A)** Scalp map of the average Hedges'g weighted by the number of studies reporting results at this electrode for the main effect of pain observation on each electrode and component. **(B)** Bar graph showing the proportion of studies included in the meta-analysis analyzing each component, reporting a significant main effect of pain and a significant interaction between this effect and another factor.

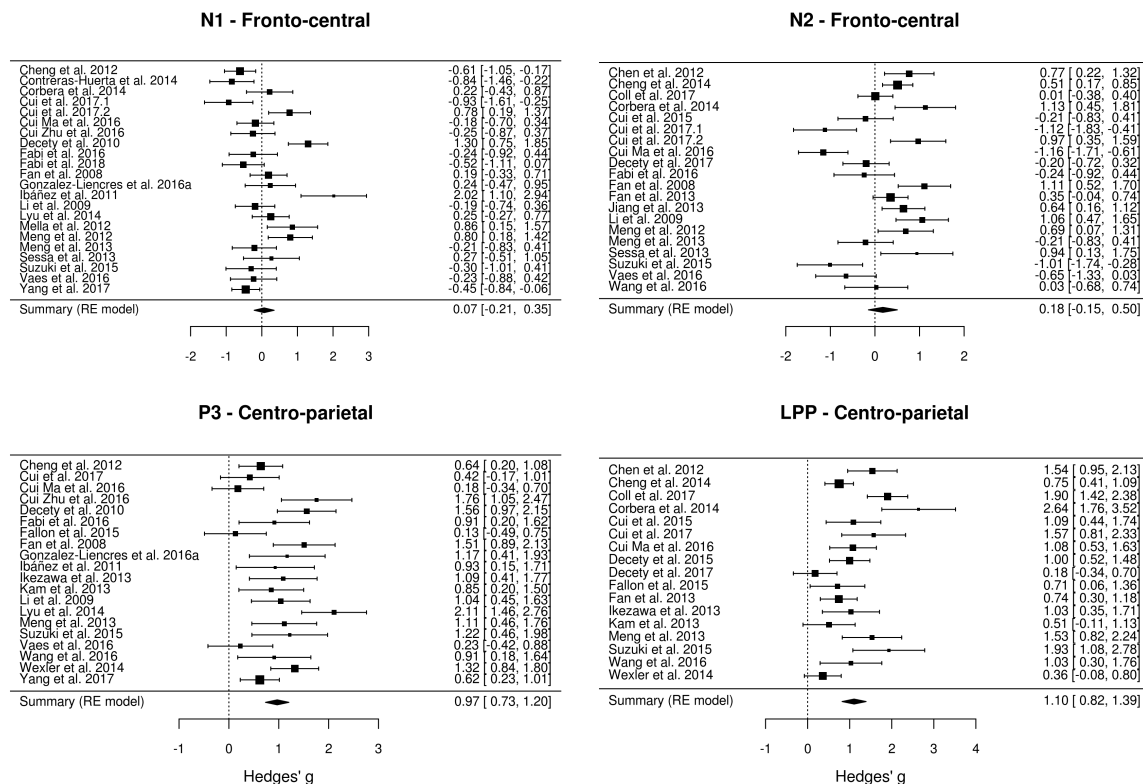

**Fig. 8.** Forest plots showing the effect size and 95% confidence interval for the effect of pain observation on the ERP amplitude at the frontal electrodes for the N1, N2, P3 and LPP components. Positive effects indicate higher (more positive) amplitudes for pain pictures and negative effects indicate lower (more negative) amplitudes for the pain pictures.

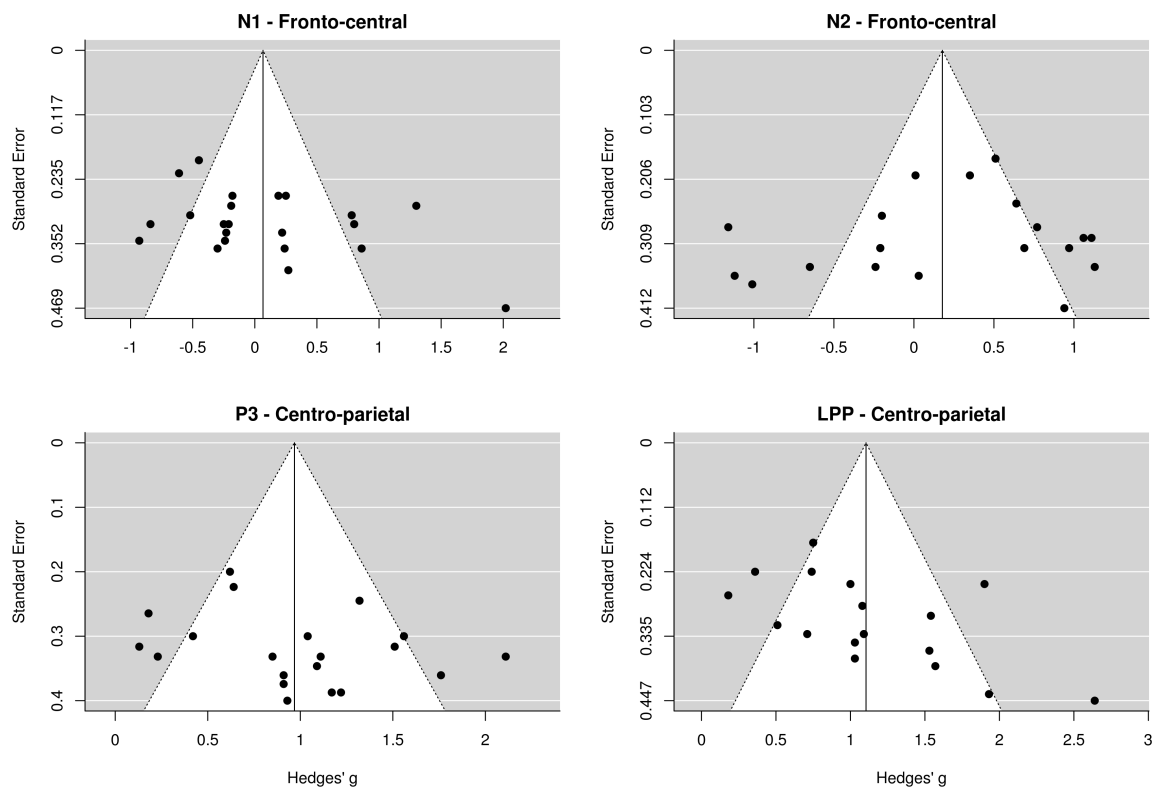

**Fig. 9.** Funnel plots showing the distribution of studies as a function of effect size and precision (standard error). The white area shows the 95% confidence interval around the summary effect size for each degree of precision.

## Discussion

The meta-analysis of 36 studies investigating pain empathy using ERPs suggests that the observation of pain in others does not reliably modulates the early N1 and N2 components often measured in these studies. However, large and reliable effects were found for the later P3 and LPP components.

These findings challenge a popular model arguing that the time-course of the ERP to the observation of pain in others is characterised by an early frontal “affective sharing response” followed by a centro-parietal “late cognitive reappraisal” of the stimulus (Decety et al., 2010; Fan and Han, 2008). Indeed, the current results suggest that the observation of pain in others does not lead to a reliable modulation of early frontal ERP components thus undermining the idea that they are associated with automatic emotion sharing. It is possible that the vicarious pain stimuli used in the studies reviewed led to a modulation of early posterior components as is generally observed for emotional stimuli (Schupp et al., 2003b,a). Unfortunately, almost none of the studies reviewed measured early responses at posterior sites, thus preventing the comparison between ERP components that are claimed to reflect empathic processes and the components usually observed in response to emotional stimuli.

The results of the meta-analysis are also compatible with a wealth ERP research showing that emotional stimuli reliably modulate the later centro-parietal components (Hajcak et al., 2010; Schupp et al., 2003a). However, since this modulation is commonly observed in response to many types of emotional stimuli, the idea that it represents an empathic response in the context of pain empathy and not a general aversive/regulatory response remains to be established. Indeed, none of the study reviewed compared the ERP response to vicarious pain stimuli to non-social emotional stimuli to assess the specificity and uniqueness of the processes indexed (Happé et al., 2017). It seems imperative for future studies using ERP to investigate pain empathy to carefully evaluate the validity, reliability and specificity of ERP responses to pain in others.

Despite the lack of reliability of the early frontal effects observed here, a considerable proportion of the studies reviewed reports significant effects of pain observation on the early frontal N1 and N2 components. This apparent contradiction could be explained by the methodological issues underlined in the systematic review of methodological practices indicating that there was considerable variability in the quantification and statistical analysis of the ERP data. Indeed, while most studies used the mean amplitude between fixed-latencies to quantify ERPs, the time-windows and the electrode locations used for this measure often varied considerably across studies without a clear rationale underlying this choice. The problems of analytical flexibility, sometimes called researcher’s degrees of freedom, have already been discussed elsewhere (Luck & Gaspelin, 2017; Simmons et al., 2011). However, the current study suggests that previous investigations of pain empathy using ERPs might be compromised by this practice.

This analytical flexibility was often combined with a shotgun analytical approach in which a high number of statistical analyses were performed on several locations and time-windows and any significant effect was

319 interpreted as meaningful. On average, the studies reviewed here performed X statistical tests on ERP data  
320 and none corrected the significance threshold to reduce the risk of a false positive finding. This is problematic  
321 since such a high number of statistical tests leads to a high probability that several significant results are in  
322 fact false positives (Kilner, 2013; Luck & Gaspelin, 2017). To diminish this risk, researchers can use analytical  
323 techniques that can take into account the spatial and temporal distribution of ERP data to reduce the number  
324 of comparisons or to adequately control for them (Groppe et al., 2011; Pernet et al., 2015; Maris & Oostenveld,  
325 2007).

326 Alternatively, researchers can restrict their analyses to scalp regions and time windows for which an effect  
327 was predicted. However, a worrying result of this study is the fact that in several cases the analysis and  
328 interpretation of the data were not constrained by the researchers' predictions since no clear hypotheses were  
329 formulated. This suggests that despite using the confirmatory analytical approach of null hypothesis significance  
330 testing, most of ERP research in the field of pain empathy is exploratory (Wagenmakers et al., 2012), even  
331 after 10 years and 40 studies. A solution to this issue would be to require researchers to clearly formulate their  
332 research hypotheses and label as exploratory the results of analyses that were not predicted. Ideally, researchers  
333 could pre-register their hypotheses online or publish using the pre-registered report format to establish the  
334 analysis plan before collecting data (Munafo et al., 2017).

335 Another striking observation permitted by this review is the lack of comprehensive reporting for the results  
336 from the statistical analysis of ERP components. Indeed, it was found that the vast majority of studies only  
337 reported significant results from a large number of factorial analyses. Therefore, in addition to a potential  
338 publication bias (Rosenthal, 1979), the ERP studies reviewed here also show a within-study reporting bias  
339 according to which analyses leading to non-significant results are less likely to be reported. Putting aside  
340 the fact that negative results can sometimes be informative if statistical power is high enough (Greenwald,  
341 1975), the main consequence of this practice is that any attempt to meta-analytically summarize the results of  
342 such studies will be difficult, inevitably biased and of questionable usefulness (Moran et al., 2017). Therefore,  
343 it should be noted that the effect size calculated in the meta-analysis performed in this report are probably  
344 inflated.

345 In several cases, this practice was justified by the necessity to provide a concise and brief report of the  
346 results. The short term solution to this issue is to make it mandatory for authors to appropriately report all  
347 the results of all statistical analyses performed on ERP components in the text or in supplementary materials.  
348 It would also be beneficial for the field of ERP research to adopt a standard reporting procedure that would  
349 enable the automatic extraction of results from published articles and facilitate meta-analyses and large-scale  
350 automated summaries of all published studies. For example, the field of functional magnetic resonance imaging  
351 research has taken advantage of the standard reporting of activation coordinates in tables to produce automated  
352 meta-analytical tools (Yarkoni et al., 2011). A more preferable long term solution would be to encourage the  
353 sharing of ERP data in online repository which would allow the re-analysis and meta-analysis of large datasets



354 and a quick and efficient assessment of the evidence for specific effects (Poldrack & Gorgolewski, 2014).

355 A related issue to the incomplete reporting of results was incomplete and unclear reporting of several  
356 important methodological details. For example, less than half of the studies reported the number of trials  
357 left after artifact rejection procedures, meaning that it was unknown how many trials were included in the  
358 analyses in a majority of cases. To avoid omitting to report such crucial information, researchers should refer  
359 to published guidelines for reporting of EEG experiments (Keil et al., 2014; Moran et al., 2017; Picton et al.,  
360 2000) and reviewers should enforce these guidelines in all relevant cases.

## 361 **Limitations.**

362 Due to the issues discussed above, the results from the meta-analysis are most likely biased. This means that  
363 while they can be used to roughly guide future investigations, the precise value of the effect sizes should not be  
364 taken at face value.

365 The high heterogeneity in the experimental designs and analytical approaches as well as partial reporting of  
366 results in the studies analysed prevented an analysis of factors modulating the ERPs to vicarious pain. It is  
367 therefore possible that the lack of effect found for the early components is due to a moderation by other factors  
368 that could not be assessed. The improvement of methods and reporting in future studies should allow a more  
369 comprehensive analysis of factors potentially modulating the effects.

370 The methodological issues highlighted in this report are not specific to the domain of pain empathy and the  
371 present observations could potentially be generalised to many other fields of research in cognitive neuroscience  
372 (e.g. Hobson & Bishop (2017), for similar observations on EEG studies of action observation). Furthermore,  
373 while several issues were found to be prevalent in the studies reviewed, the scientific quality and usefulness of  
374 all papers cited in this report should be assessed on an individual basis.

375 Finally, the solutions proposed to the issues raised are not exhaustive, nor can they be applied indiscriminately  
376 to all ERP research.

## 377 **Conclusion**

378 In conclusion, this study provides meta-analytic evidence for a robust modulation of later, but not early  
379 ERP components during pain observation. Furthermore, it suggests current framework used in pain empathy  
380 research using ERPs the investigation of the empathic response to pain in others using ERPs is undermined by  
381 several methodological problems that raise doubts regarding the reliability, validity and overall usefulness of  
382 this research. Researchers in the field should take into account the methodological issues raised here when  
383 designing and reviewing ERP experiments. This is of critical importance if this paradigm is to be used to draw  
384 conclusions on socio-emotional functioning in different clinical populations.

## Acknowledgements

MP Coll is funded by a fellowship from the Canadian Institutes of Health Research and was funded by a fellowship from the Fonds de Recherche Quebec - Sante during this work. The author declares no conflict of interest.

## List of Figures

**Figure 1.** PRISMA flowchart. Reasons for exclusions are shown in Table S1.

**Figure 2. (A)** Total sample size, sample size per group and number of exclusion. For all box plots in this paper, the boxes show the 25th and 75th percentile, the error bars show 1.5 interquartile interval, the horizontal line shows the median, the red square shows the mean and the gray points show the individual studies. **(B)** Proportion of studies as a function of the level of power to detect a small ( $d = 0.2$ ), medium ( $d = 0.5$ ) and large ( $d = 0.8$ ) effect size.

**Figure 3. (A)** Stimulus duration and **(B)** number of trials per condition.

**Figure 4. (A)** Percentage of studies analyzing each of the main component. **(B)** Percentage of studies analyzing each scalp location. **(C)** Number of components and locations analyzed in each study. **(D)** Percentage of studies analyzing each component analyzing each time-point in the post-stimulus window..

**Figure 5. (A)** Number of components and locations analyzed in each study. **(B)** Percentage of studies analyzing each of the main component. **(C)** Percentage of studies analyzing each scalp location. **(D)** Percentage of studies analyzing each component analyzing each time-point in the post-stimulus window.

**Figure 6. (A)** Number of ANOVAs performed, **(B)** total number of statistical tests performed using ANOVAs, **(C)** number of correlations and **(D)** overall number of statistical tests performed.

**Figure 7. (A)** Scalp map of the average Hedges'  $g$  weighted by the number of studies reporting results at this electrode for the main effect of pain observation on each electrode and component. **(B)** Bar graph showing the proportion of studies included in the meta-analysis analyzing each component, reporting a significant main effect of pain and a significant interaction between this effect and another factor.

**Figure 8.** Forest plots showing the effect size and 90% confidence interval for the effect of pain observation on the ERP amplitude at the frontal electrodes from the N1, N2, P3 and LPP components. Positive effects indicate higher (more positive) amplitudes for pain pictures and negative effects indicate lower (more negative) amplitudes for the pain pictures.

## References

- \*Included in the systematic review
- \*\*Included in the systematic review and meta-analysis
- Batson, C. D. (2009). These things called empathy: eight related but distinct phenomena. In J. Decety & W. Ickes (Eds.), *The social neuroscience of empathy* (pp. 3–16). The MIT Press. DOI: [10.7551/mitpress/9780262012973.003.0002](https://doi.org/10.7551/mitpress/9780262012973.003.0002).
- Bird, G. & Viding, E. (2014). The self to other model of empathy: providing a new framework for understanding empathy impairments in psychopathy, autism, and alexithymia. *Neurosci Biobehav Rev*, 47, 520–532. DOI: [10.1016/j.neubiorev.2014.09.021](https://doi.org/10.1016/j.neubiorev.2014.09.021).
- Brozek, J. & Alexander, H. (1950). The formula  $t_2 = f$ . *Am J Psychol*, 63(2), 262–269. DOI: [10.2307/1418933](https://doi.org/10.2307/1418933).
- Carp, J. (2012). The secret lives of experiments: methods reporting in the fmri literature. *Neuroimage*, 63(1), 289–300. DOI: [10.1016/j.neuroimage.2012.07.004](https://doi.org/10.1016/j.neuroimage.2012.07.004).
- \*\*Chen, C., Yang, C.-Y., & Cheng, Y. (2012). Sensorimotor resonance is an outcome but not a platform to anticipating harm to others. *Soc Neurosci*, 7(6), 578–590. DOI: [10.1080/17470919.2012.686924](https://doi.org/10.1080/17470919.2012.686924).
- \*\*Cheng, Y., Chen, C., & Decety, J. (2014). An eeg/erp investigation of the development of empathy in early and middle childhood. *Dev Cogn Neurosci*, 10, 160–169. DOI: [10.1016/j.dcn.2014.08.012](https://doi.org/10.1016/j.dcn.2014.08.012).
- \*\*Cheng, Y., Hung, A.-Y., & Decety, J. (2012). Dissociation between affective sharing and emotion understanding in juvenile psychopaths. *Dev Psychopathol*, 24(2), 623–636. DOI: [10.1017/S095457941200020X](https://doi.org/10.1017/S095457941200020X).
- Cohen, J. (1992). A power primer. *Psychol Bull*, 112(1), 155–159. DOI: [10.1037/0033-2909.112.1.155](https://doi.org/10.1037/0033-2909.112.1.155).
- \*\*Coll, M.-P., Tremblay, M.-P. B., & Jackson, P. L. (2017). The effect of tdcS over the right temporo-parietal junction on pain empathy. *Neuropsychologia*, 100, 110–119. DOI: [10.1016/j.neuropsychologia.2017.04.021](https://doi.org/10.1016/j.neuropsychologia.2017.04.021).
- Coll, M.-P., Viding, E., Rütgen, M., Silani, G., Lamm, C., Catmur, C., & Bird, G. (2017). Are we really measuring empathy? proposal for a new measurement framework. *Neurosci Biobehav Rev*. DOI: [10.1016/j.neubiorev.2017.10.009](https://doi.org/10.1016/j.neubiorev.2017.10.009).
- \*\*Contreras-Huerta, L. S., Hielscher, E., Sherwell, C. S., Rens, N., & Cunningham, R. (2014). Intergroup relationships do not reduce racial bias in empathic neural responses to pain. *Neuropsychologia*, 64, 263–270. DOI: [10.1016/j.neuropsychologia.2014.09.045](https://doi.org/10.1016/j.neuropsychologia.2014.09.045).
- Cooper, H. & Hedges, L. (1994). *The Handbook of Research Synthesis and Meta-Analysis*. New York: Russel Sage Foundation.
- \*\*Corbera, S., Ikezawa, S., Bell, M. D., & Wexler, B. E. (2014). Physiological evidence of a deficit to enhance the empathic response in schizophrenia. *Eur Psychiatry*, 29(8), 463–472. DOI: [10.1016/j.eurpsy.2014.01.005](https://doi.org/10.1016/j.eurpsy.2014.01.005).
- Cuff, B. M. P., Brown, S. J., Taylor, L., & Howat, D. J. (2016). Empathy: A review of the concept. *Emotion review: journal of the International Society for Research on Emotion*, 8(2), 144–153. DOI: [10.1177/1754073914558466](https://doi.org/10.1177/1754073914558466).
- \*\*Cui, F., Ma, N., & Luo, Y.-J. (2016). Moral judgment modulates neural responses to the perception of other's pain: an erp study. *Sci Rep*, 6(1), 20851. DOI: [10.1038/srep20851](https://doi.org/10.1038/srep20851).
- \*\*Cui, F., Zhu, X., Duan, F., & Luo, Y. (2016). Instructions of cooperation and competition influence the neural responses to others' pain: An erp study. *Soc Neurosci*, 11(3), 289–296. DOI: [10.1080/17470919.2015.1078258](https://doi.org/10.1080/17470919.2015.1078258).
- \*\*Cui, F., Zhu, X., Gu, R., & Luo, Y.-J. (2016). When your pain signifies my gain: neural activity while evaluating outcomes based on another person's pain. *Sci Rep*, 6(0), 26426. DOI: [10.1038/srep26426](https://doi.org/10.1038/srep26426).
- \*\*Cui, F., Zhu, X., & Luo, Y. (2017). Social contexts modulate neural responses in the processing of others' pain: An event-related potential study. *Cogn Affect Behav Neurosci*, 17(4), 850–857. DOI: [10.3758/s13415-017-0517-9](https://doi.org/10.3758/s13415-017-0517-9).
- de Vignemont, F. & Singer, T. (2006). The empathic brain: how, when and why? *Trends Cogn Sci (Regul Ed)*, 10(10), 435–441. DOI: [10.1016/j.tics.2006.08.008](https://doi.org/10.1016/j.tics.2006.08.008).
- Decety, J. & Jackson, P. L. (2004). The functional architecture of human empathy. *Behav Cogn Neurosci Rev*, 3(2), 71–100. DOI: [10.1177/1534582304267187](https://doi.org/10.1177/1534582304267187).
- \*\*Decety, J., Lewis, K. L., & Cowell, J. M. (2015). Specific electrophysiological components disentangle affective sharing and empathic concern in psychopathy. *J Neurophysiol*, 114(1), 493–504. DOI: [10.1152/jn.00253.2015](https://doi.org/10.1152/jn.00253.2015).
- \*\*Decety, J., Meidenbauer, K. L., & Cowell, J. M. (2017). The development of cognitive empathy and concern in preschool children: A behavioral neuroscience investigation. *Dev Sci*. DOI: [10.1111/desc.12570](https://doi.org/10.1111/desc.12570).
- Decety, J. & Moriguchi, Y. (2007). The empathic brain and its dysfunction in psychiatric populations: implications for intervention across different clinical conditions. *Biopsychosoc Med*, 1, 22. DOI: [10.1186/1751-0759-1-22](https://doi.org/10.1186/1751-0759-1-22).

- 463 \*\*Decety, J., Yang, C.-Y., & Cheng, Y. (2010). Physicians down-regulate their pain empathy response: an event-related  
464 brain potential study. *Neuroimage*, 50(4), 1676–1682. DOI: 10.1016/j.neuroimage.2010.01.025.
- 465 Egger, M., Davey Smith, G., Schneider, M., & Minder, C. (1997). Bias in meta-analysis detected by a simple, graphical  
466 test. *BMJ*, 315(7109), 629–634. DOI: 10.1136/bmj.315.7109.629.
- 467 \*\*Fabi, S. & Leuthold, H. (2016). Empathy for pain influences perceptual and motor processing: Evidence from response  
468 force, erps, and eeg oscillations. *Soc Neurosci*, 1–16. DOI: 10.1080/17470919.2016.1238009.
- 469 \*\*Fallon, N., Li, X., Chiu, Y., Nurmikko, T., & Stancak, A. (2015). Altered cortical processing of observed pain in patients  
470 with fibromyalgia syndrome. *J Pain*, 16(8), 717–726. DOI: 10.1016/j.jpain.2015.04.008.
- 471 \*\*Fan, Y. & Han, S. (2008). Temporal dynamic of neural mechanisms involved in empathy for pain: an event-related  
472 brain potential study. *Neuropsychologia*, 46(1), 160–173. DOI: 10.1016/j.neuropsychologia.2007.07.023.
- 473 \*\*Fan, Y.-T., Chen, C., Chen, S.-C., Decety, J., & Cheng, Y. (2014). Empathic arousal and social understanding in  
474 individuals with autism: evidence from fmri and erp measurements. *Soc Cogn Affect Neurosci*, 9(8), 1203–1213.  
475 DOI: 10.1093/scan/nst101.
- 476 \*Fitzgibbon, B. M., Enticott, P. G., Giummarra, M. J., Thomson, R. H., Georgiou-Karistianis, N., & Bradshaw, J. L. (2012).  
477 Atypical electrophysiological activity during pain observation in amputees who experience synaesthetic pain. *Soc*  
478 *Cogn Affect Neurosci*, 7(3), 357–368. DOI: 10.1093/scan/nsr016.
- 479 \*\*Gonzalez-Liencre, C., Breidenstein, A., Wolf, O. T., & Brüne, M. (2016). Sex-dependent effects of stress on brain  
480 correlates to empathy for pain. *Int J Psychophysiol*, 105, 47–56. DOI: 10.1016/j.ijpsycho.2016.04.011.
- 481 \*\*Gonzalez-Liencre, C., Brown, E. C., Tas, C., Breidenstein, A., & Brüne, M. (2016). Alterations in event-related potential  
482 responses to empathy for pain in schizophrenia. *Psychiatry Res*, 241, 14–21. DOI: 10.1016/j.psychres.2016.04.091.
- 483 Greenwald, A. G. (1975). Consequences of prejudice against the null hypothesis. *Psychol Bull*, 82(1), 1–20. DOI:  
484 10.1037/h0076157.
- 485 Grope, D. M., Urbach, T. P., & Kutas, M. (2011). Mass univariate analysis of event-related brain potentials/fields i: a  
486 critical tutorial review. *Psychophysiology*, 48(12), 1711–1725. DOI: 10.1111/j.1469-8986.2011.01273.x.
- 487 Hajcak, G., MacNamara, A., & Olvet, D. M. (2010). Event-related potentials, emotion, and emotion regulation: an  
488 integrative review. *Dev Neuropsychol*, 35(2), 129–155. DOI: 10.1080/87565640903526504.
- 489 \*Han, S., Fan, Y., & Mao, L. (2008). Gender difference in empathy for pain: an electrophysiological investigation. *Brain*  
490 *Res*, 1196, 85–93. DOI: 10.1016/j.brainres.2007.12.062.
- 491 Happé, F., Cook, J. L., & Bird, G. (2017). The structure of social cognition: in(ter)dependence of sociocognitive  
492 processes. *Annu Rev Psychol*, 68, 243–267. DOI: 10.1146/annurev-psych-010416-044046.
- 493 Hedges, L. V. (1981). Distribution theory for glass's estimator of effect size and related estimators. *Journal of Educational*  
494 *Statistics*, 6(2), 107–128.
- 495 Hobson, H. M. & Bishop, D. V. M. (2017). The interpretation of mu suppression as an index of mirror neuron activity:  
496 past, present and future. *R Soc Open Sci*, 4(3), 160662. DOI: 10.1098/rsos.160662.
- 497 \*\*Ibáñez, A., Hurtado, E., Lobos, A., Escobar, J., Trujillo, N., Baez, S., Huepe, D., Manes, F., & Decety, J. (2011).  
498 Subliminal presentation of other faces (but not own face) primes behavioral and evoked cortical processing of empathy  
499 for pain. *Brain Res*, 1398, 72–85. DOI: 10.1016/j.brainres.2011.05.014.
- 500 \*Ikezawa, S., Corbera, S., Liu, J., & Wexler, B. E. (2012). Empathy in electrodermal responsive and nonresponsive  
501 patients with schizophrenia. *Schizophr Res*, 142(1-3), 71–76. DOI: 10.1016/j.schres.2012.09.011.
- 502 \*\*Ikezawa, S., Corbera, S., & Wexler, B. E. (2014). Emotion self-regulation and empathy depend upon longer stimulus  
503 exposure. *Soc Cogn Affect Neurosci*, 9(10), 1561–1568. DOI: 10.1093/scan/nst148.
- 504 Ioannidis, J. P. & Trikalinos, T. A. (2007). An exploratory test for an excess of significant findings. *Clinical trials*, 4(3),  
505 245–253. DOI: 10.1177/1740774507079441.
- 506 Jackson, P. L., Meltzoff, A. N., & Decety, J. (2005). How do we perceive the pain of others? a window into the neural  
507 processes involved in empathy. *Neuroimage*, 24(3), 771–779. DOI: 10.1016/j.neuroimage.2004.09.006.
- 508 \*\*Jiang, C., Varum, M. E. W., Hou, Y., & Han, S. (2014). Distinct effects of self-construal priming on empathic neural  
509 responses in chinese and westerners. *Soc Neurosci*, 9(2), 130–138. DOI: 10.1080/17470919.2013.867899.
- 510 \*\*Kam, J. W. Y., Xu, J., & Handy, T. C. (2014). I don't feel your pain (as much): the desensitizing effect of mind wandering  
511 on the perception of others' discomfort. *Cogn Affect Behav Neurosci*, 14(1), 286–296. DOI:10.3758/s13415-013-  
512 0197-z.
- 513 Keil, A., Debener, S., Gratton, G., Junghöfer, M., Kappenman, E. S., Luck, S. J., Luu, P., Miller, G. A., & Yee, C. M.  
514 (2014). Committee report: publication guidelines and recommendations for studies using electroencephalography

and magnetoencephalography. *Psychophysiology*, 51(1), 1–21. DOI: 10.1111/psyp.12147.

Kilner, J. (2013). Bias in a common eeg and meg statistical analysis and how to avoid it. *Clin Neurophysiol*, 124(10), 2062–2063. DOI: 10.1016/j.clinph.2013.03.024.

Klimecki, O. & Singer, T. (2013). Empathy from the perspective of social neuroscience. In *Handbook of human affective neuroscience* (pp. 533–551). Cambridge University Press.

\*\*Li, W. & Han, S. (2010). Perspective taking modulates event-related potentials to perceived pain. *Neurosci Lett*, 469(3), 328–332. DOI: 10.1016/j.neulet.2009.12.021.

Luck, S. J. & Gaspelin, N. (2017). How to get statistically significant effects in any erp experiment (and why you shouldn't). *Psychophysiology*, 54(1), 146–157. DOI: 10.1111/psyp.12639.

\*\*Lyu, Z., Meng, J., & Jackson, T. (2014). Effects of cause of pain on the processing of pain in others: an erp study. *Exp Brain Res*, 232(9), 2731–2739. DOI:10.1007/s00221-014-3952-7.

Maris, E. & Oostenveld, R. (2007). Nonparametric statistical testing of eeg-and meg-data. *Journal of neuroscience methods*, 164(1), 177–190. DOI: 10.1016/j.jneumeth.2007.03.024.

\*\*Mella, N., Studer, J., Gilet, A.-L., & Labouvie-Vief, G. (2012). Empathy for pain from adolescence through adulthood: An event-related brain potential study. *Front Psychol*, 3, 501. DOI: 10.3389/fpsyg.2012.00501.

\*\*Meng, J., Hu, L., Shen, L., Yang, Z., Chen, H., Huang, X., & Jackson, T. (2012). Emotional primes modulate the responses to others' pain: an erp study. *Exp Brain Res*, 220(3-4), 277–286. DOI: 10.1007/s00221-012-3136-2.

\*\*Meng, J., Jackson, T., Chen, H., Hu, L., Yang, Z., Su, Y., & Huang, X. (2013). Pain perception in the self and observation of others: an erp investigation. *Neuroimage*, 72, 164–173. DOI: 10.1016/j.neuroimage.2013.01.024.

Moher, D., Liberati, A., Tetzlaff, J., Altman, D. G., & Group, P. (2009). Preferred reporting items for systematic reviews and meta-analyses: the PRISMA statement. *PLoS Med*, 6(7), e1000097. DOI: 10.1371/journal.pmed.1000097.

Moran, T. P., Schroder, H. S., Kneip, C., & Moser, J. S. (2017). Meta-analysis and psychophysiology: A tutorial using depression and action-monitoring event-related potentials. *Int J Psychophysiol*, 111, 17–32. DOI: 10.1016/j.jpsycho.2016.07.001.

Munafo, M., Nosek, B., Bishop, D., Button, K., Chambers, C., Percie du Sert, N., Simonsohn, U., Wagenmakers, E., Ware, J., & Ioannidis, J. (2017). A manifesto for reproducible science. *Nat Hum Behav*, 1(1), 0021. DOI: 10.1038/s41562-016-0021.

Oostenveld, R., Fries, P., Maris, E., & Schoffelen, J.-M. (2011). FieldTrip: Open source software for advanced analysis of MEG, EEG, and invasive electrophysiological data. *Comput Intell Neurosci*, 2011, 156869. DOI: 10.1155/2011/156869.

Pernet, C. R., Latinus, M., Nichols, T. E., & Rousselet, G. A. (2015). Cluster-based computational methods for mass univariate analyses of event-related brain potentials/fields: A simulation study. *J Neurosci Methods*, 250, 85–93. DOI: 10.1016/j.jneumeth.2014.08.003.

Picton, T. W., Bentin, S., Berg, P., Donchin, E., Hillyard, S. A., Johnson, R., Miller, G. A., Ritter, W., Ruchkin, D. S., Rugg, M. D., & Taylor, M. J. (2000). Guidelines for using human event-related potentials to study cognition: recording standards and publication criteria. *Psychophysiology*, 37(2), 127–152.

Poldrack, R. A., Fletcher, P. C., Henson, R. N., Worsley, K. J., Brett, M., & Nichols, T. E. (2008). Guidelines for reporting an fmri study. *Neuroimage*, 40(2), 409–414. DOI: 10.1016/j.neuroimage.2007.11.048.

Poldrack, R. A. & Gorgolewski, K. J. (2014). Making big data open: data sharing in neuroimaging. *Nat Neurosci*, 17(11), 1510–1517. DOI: 10.1038/nn.3818.

R Core Team (2018). *R: A Language and Environment for Statistical Computing*. Vienna, Austria: R Foundation for Statistical Computing.

Rosenthal, R. (1979). The file drawer problem and tolerance for null results. *Psychol Bull*, 86(3), 638–641.

RStudio Team (2015). *RStudio: Integrated Development Environment for R*. Boston, MA: RStudio, Inc.

Schupp, H. T., Junghöfer, M., Weike, A. I., & Hamm, A. O. (2003a). Attention and emotion: an ERP analysis of facilitated emotional stimulus processing. *Neuroreport*, 14(8), 1107–1110. DOI: 10.1097/01.wnr.0000075416.59944.49.

Schupp, H. T., Junghöfer, M., Weike, A. I., & Hamm, A. O. (2003b). Emotional facilitation of sensory processing in the visual cortex. *Psychol Sci*, 14(1), 7–13. DOI: 10.1111/1467-9280.01411.

\*\*Sessa, P., Meconi, F., Castelli, L., & Dell'Acqua, R. (2014). Taking one's time in feeling other-race pain: an event-related potential investigation on the time-course of cross-racial empathy. *Soc Cogn Affect Neurosci*, 9(4), 454–463. DOI: 10.1093/scan/nst003.



- 566 Simmons, J. P., Nelson, L. D., & Simonsohn, U. (2011). False-positive psychology: undisclosed flexibility in  
567 data collection and analysis allows presenting anything as significant. *Psychol Sci*, 22(11), 1359–1366. DOI:  
568 [10.1177/0956797611417632](https://doi.org/10.1177/0956797611417632).
- 569 \*Sun, Y.-B., Lin, X.-X., Ye, W., Wang, N., Wang, J.-Y., & Luo, F. (2017). A screening mechanism differentiating true from  
570 false pain during empathy. *Sci Rep*, 7(1), 11492. DOI: [10.1038/s41598-017-11963-x](https://doi.org/10.1038/s41598-017-11963-x).
- 571 \*\*Suzuki, Y., Galli, L., Ikeda, A., Itakura, S., & Kitazaki, M. (2015). Measuring empathy for human and robot hand pain  
572 using electroencephalography. *Sci Rep*, 5, 15924. DOI: [10.1038/srep15924](https://doi.org/10.1038/srep15924).
- 573 Vachon-Presseau, E., Roy, M., Martel, M. O., Albouy, G., Chen, J., Budell, L., Sullivan, M. J., Jackson, P. L., & Rainville,  
574 P. (2012). Neural processing of sensory and emotional-communicative information associated with the perception of  
575 vicarious pain. *Neuroimage*, 63(1), 54–62. DOI: [10.1016/j.neuroimage.2012.06.030](https://doi.org/10.1016/j.neuroimage.2012.06.030).
- 576 \*\*Vaes, J., Meconi, F., Sessa, P., & Olechowski, M. (2016). Minimal humanity cues induce neural empathic reactions  
577 towards non-human entities. *Neuropsychologia*, 89, 132–140. DOI: [10.1016/j.neuropsychologia.2016.06.004](https://doi.org/10.1016/j.neuropsychologia.2016.06.004).
- 578 Wagenmakers, E.-J., Wetzels, R., Borsboom, D., van der Maas, H. L. J., & Kievit, R. A. (2012). An agenda for purely  
579 confirmatory research. *Perspectives on Psychological Science*, 7(6), 632–638. DOI: [10.1177/1745691612463078](https://doi.org/10.1177/1745691612463078).
- 580 \*\*Wang, Y., Song, J., Guo, F., Zhang, Z., Yuan, S., & Cacioppo, S. (2016). Spatiotemporal brain dynamics of empathy  
581 for pain and happiness in friendship. *Front Behav Neurosci*, 10, 45. DOI: [10.3389/fnbeh.2016.00045](https://doi.org/10.3389/fnbeh.2016.00045).
- 582 \*\*Wexler, B. E., Ikezawa, S., & Corbera, S. (2014). Increasing stimulus duration can normalize late-positive event related  
583 potentials in people with schizophrenia: Possible implications for understanding cognitive deficits. *Schizophr Res*,  
584 158(1-3), 163–169. DOI: [10.1016/j.schres.2014.07.012](https://doi.org/10.1016/j.schres.2014.07.012).
- 585 \*\*Yang, J., Hu, X., Li, X., Zhang, L., Dong, Y., Li, X., Zhu, C., Xie, W., Mu, J., Yuan, S., Chen, J., Chen, F., Yu, F., & Wang,  
586 K. (2017). Decreased empathy response to other people's pain in bipolar disorder: evidence from an event-related  
587 potential study. *Sci Rep*, 7, 39903. DOI: [10.1038/srep39903](https://doi.org/10.1038/srep39903).
- 588 Yarkoni, T., Poldrack, R. A., Nichols, T. E., Van Essen, D. C., & Wager, T. D. (2011). Large-scale automated synthesis of  
589 human functional neuroimaging data. *Nat Methods*, 8(8), 665–670. DOI: [10.1038/nmeth.1635](https://doi.org/10.1038/nmeth.1635).
